# Supplementary material for: SIRT2 inhibition protects against cardiac hypertrophy and ischemic injury
Source: eLife. 2023 Sep 20;12:e85571. doi: 10.7554/eLife.85571 (PMC10558204; doi:10.7554/eLife.85571)
Supplement: Figure 4—figure supplement 2—source data 1. [file elife-85571-fig4-figsupp2-data1.xlsx]

## Sheet: WT1-w1
FUJIFILM VisualSonics Measurement Export
Institution	Northwestern University
Report Date	2023-07-13
Version Information
Company Name	Model	SW Version	SW Build	Report Version
FUJIFILM VisualSonics, Inc.	Vevo 2100	2.2.0	12089	8
Measurement File	VSI_CardiacPackage.sxml
Measurement Version	5
Measurement Description	Cardiac Package
Protocol Name	PSLAX M-Mode
Measurement	Mode	Parameter	Units	Instance 1
IVS;d	M-Mode	Depth	mm	0.930563
IVS;s	M-Mode	Depth	mm	1.25626
LV Trace	M-Mode	Heart Rate	BPM	420.725
LV Trace	M-Mode	Diameter;s	mm	3.07304
LV Trace	M-Mode	Diameter;d	mm	3.98816
LV Trace	M-Mode	Volume;s	uL	42.5615
LV Trace	M-Mode	Volume;d	uL	79.2039
LV Trace	M-Mode	Stroke Volume	uL	36.6424
LV Trace	M-Mode	Ejection Fraction	%	41.0718
LV Trace	M-Mode	Fractional Shortening	%	19.4152
LV Trace	M-Mode	Cardiac Output	mL/min	16.9641
LVID;d	M-Mode	Depth	mm	3.90837
LVID;s	M-Mode	Depth	mm	3.1329
LVPW;d	M-Mode	Depth	mm	0.806488
LVPW;s	M-Mode	Depth	mm	0.915054

## Sheet: WT2-w1
FUJIFILM VisualSonics Measurement Export
Institution	Northwestern University
Report Date	2023-07-13
Version Information
Company Name	Model	SW Version	SW Build	Report Version
FUJIFILM VisualSonics, Inc.	Vevo 2100	2.2.0	12089	8
Measurement File	VSI_CardiacPackage.sxml
Measurement Version	5
Measurement Description	Cardiac Package
Protocol Name	PSLAX M-Mode
Measurement	Mode	Parameter	Units	Instance 1
IVS;d	M-Mode	Depth	mm	1.21048
IVS;s	M-Mode	Depth	mm	1.60573
LV Trace	M-Mode	Heart Rate	BPM	648.504
LV Trace	M-Mode	Diameter;s	mm	5.72021
LV Trace	M-Mode	Diameter;d	mm	6.72303
LV Trace	M-Mode	Volume;s	uL	106.362
LV Trace	M-Mode	Volume;d	uL	155.366
LV Trace	M-Mode	Stroke Volume	uL	49.0042
LV Trace	M-Mode	Ejection Fraction	%	42.5694
LV Trace	M-Mode	Fractional Shortening	%	21.6017
LV Trace	M-Mode	Cardiac Output	mL/min	23.2272
LVID;d	M-Mode	Depth	mm	6.54646
LVID;s	M-Mode	Depth	mm	5.70653
LVPW;d	M-Mode	Depth	mm	1.21048
LVPW;s	M-Mode	Depth	mm	1.3587

## Sheet: WT3-w1
FUJIFILM VisualSonics Measurement Export
Institution	Northwestern University
Report Date	2023-07-13
Version Information
Company Name	Model	SW Version	SW Build	Report Version
FUJIFILM VisualSonics, Inc.	Vevo 2100	2.2.0	12089	8
Measurement File	VSI_CardiacPackage.sxml
Measurement Version	5
Measurement Description	Cardiac Package
Protocol Name	PSLAX M-Mode
Measurement	Mode	Parameter	Units	Instance 1
IVS;d	M-Mode	Depth	mm	0.694433
IVS;s	M-Mode	Depth	mm	0.888874
LV Trace	M-Mode	Heart Rate	BPM	485.676
LV Trace	M-Mode	Diameter;s	mm	2.69082
LV Trace	M-Mode	Diameter;d	mm	3.75022
LV Trace	M-Mode	Volume;s	uL	27.3416
LV Trace	M-Mode	Volume;d	uL	61.1925
LV Trace	M-Mode	Stroke Volume	uL	33.8509
LV Trace	M-Mode	Ejection Fraction	%	48.7175
LV Trace	M-Mode	Fractional Shortening	%	22.568
LV Trace	M-Mode	Cardiac Output	mL/min	16.6689
LVID;d	M-Mode	Depth	mm	3.69438
LVID;s	M-Mode	Depth	mm	2.8194
LVPW;d	M-Mode	Depth	mm	0.72221
LVPW;s	M-Mode	Depth	mm	0.94443

## Sheet: WT4-w1
FUJIFILM VisualSonics Measurement Export
Institution	Northwestern University
Report Date	2023-07-13
Version Information
Company Name	Model	SW Version	SW Build	Report Version
FUJIFILM VisualSonics, Inc.	Vevo 2100	2.2.0	12089	8
Measurement File	VSI_CardiacPackage.sxml
Measurement Version	5
Measurement Description	Cardiac Package
Protocol Name	PSLAX M-Mode
Measurement	Mode	Parameter	Units	Instance 1
IVS;d	M-Mode	Depth	mm	0.770011
IVS;s	M-Mode	Depth	mm	1.06058
LV Trace	M-Mode	Heart Rate	BPM	393.524
LV Trace	M-Mode	Diameter;s	mm	3.07204
LV Trace	M-Mode	Diameter;d	mm	4.23026
LV Trace	M-Mode	Volume;s	uL	41.5944
LV Trace	M-Mode	Volume;d	uL	89.0745
LV Trace	M-Mode	Stroke Volume	uL	47.48
LV Trace	M-Mode	Ejection Fraction	%	51.0025
LV Trace	M-Mode	Fractional Shortening	%	24.2163
LV Trace	M-Mode	Cardiac Output	mL/min	20.2435
LVID;d	M-Mode	Depth	mm	4.19874
LVID;s	M-Mode	Depth	mm	3.1091
LVPW;d	M-Mode	Depth	mm	0.493969
LVPW;s	M-Mode	Depth	mm	0.726425

## Sheet: WT5-w1
FUJIFILM VisualSonics Measurement Export
Institution	Northwestern University
Report Date	45120
Version Information
Company Name	Model	SW Version	SW Build	Report Version
FUJIFILM VisualSonics, Inc.	Vevo 2100	2.2.0	12089	8
Measurement File	VSI_CardiacPackage.sxml
Measurement Version	5
Measurement Description	Cardiac Package
Protocol Name	PSLAX M-Mode
Measurement	Mode	Parameter	Units	Instance 1
IVS;d	M-Mode	Depth	mm	1.17829
IVS;s	M-Mode	Depth	mm	1.55142
LV Trace	M-Mode	Heart Rate	BPM	550.556
LV Trace	M-Mode	Diameter;s	mm	3.4881
LV Trace	M-Mode	Diameter;d	mm	4.38891
LV Trace	M-Mode	Volume;s	uL	44.8004
LV Trace	M-Mode	Volume;d	uL	77.7464
LV Trace	M-Mode	Stroke Volume	uL	32.946
LV Trace	M-Mode	Ejection Fraction	%	50.7917
LV Trace	M-Mode	Fractional Shortening	%	21.9094
LV Trace	M-Mode	Cardiac Output	mL/min	16.6768
LVID;d	M-Mode	Depth	mm	4.10438
LVID;s	M-Mode	Depth	mm	3.51524
LVPW;d	M-Mode	Depth	mm	1.09974
LVPW;s	M-Mode	Depth	mm	1.21757

## Sheet: KO1-w1
FUJIFILM VisualSonics Measurement Export
Institution	Northwestern University
Report Date	2023-07-13
Version Information
Company Name	Model	SW Version	SW Build	Report Version
FUJIFILM VisualSonics, Inc.	Vevo 2100	2.2.0	12089	8
Measurement File	VSI_CardiacPackage.sxml
Measurement Version	5
Measurement Description	Cardiac Package
Measurement	Mode	Parameter	Units	Instance 1
IVS;d	M-Mode	Depth	mm	0.795493
IVS;s	M-Mode	Depth	mm	1.3495
LV Trace	M-Mode	Heart Rate	BPM	398.257
LV Trace	M-Mode	Diameter;s	mm	2.43818
LV Trace	M-Mode	Diameter;d	mm	3.68176
LV Trace	M-Mode	Volume;s	uL	24.4394
LV Trace	M-Mode	Volume;d	uL	66.256
LV Trace	M-Mode	Stroke Volume	uL	41.8166
LV Trace	M-Mode	Ejection Fraction	%	50.5606
LV Trace	M-Mode	Fractional Shortening	%	25.2601
LV Trace	M-Mode	Cardiac Output	mL/min	18.4539
LVID;d	M-Mode	Depth	mm	3.56551
LVID;s	M-Mode	Depth	mm	2.41489
LVPW;d	M-Mode	Depth	mm	0.710262
LVPW;s	M-Mode	Depth	mm	1.03698

## Sheet: KO2-w1
FUJIFILM VisualSonics Measurement Export
Institution	Northwestern University
Report Date	2023-07-13
Version Information
Company Name	Model	SW Version	SW Build	Report Version
FUJIFILM VisualSonics, Inc.	Vevo 2100	2.2.0	12089	8
Measurement File	VSI_CardiacPackage.sxml
Measurement Version	5
Measurement Description	Cardiac Package
Measurement	Mode	Parameter	Units	Instance 1
IVS;d	M-Mode	Depth	mm	0.820028
IVS;s	M-Mode	Depth	mm	1.22259
LV Trace	M-Mode	Heart Rate	BPM	530.676
LV Trace	M-Mode	Diameter;s	mm	2.83646
LV Trace	M-Mode	Diameter;d	mm	4.01505
LV Trace	M-Mode	Volume;s	uL	30.5132
LV Trace	M-Mode	Volume;d	uL	70.6353
LV Trace	M-Mode	Stroke Volume	uL	40.1221
LV Trace	M-Mode	Ejection Fraction	%	57.0852
LV Trace	M-Mode	Fractional Shortening	%	29.3607
LV Trace	M-Mode	Cardiac Output	mL/min	21.2918
LVID;d	M-Mode	Depth	mm	3.95105
LVID;s	M-Mode	Depth	mm	2.90737
LVPW;d	M-Mode	Depth	mm	0.76039
LVPW;s	M-Mode	Depth	mm	1.14804

## Sheet: ko3-w1
FUJIFILM VisualSonics Measurement Export
Institution	Northwestern University
Report Date	2023-07-13
Version Information
Company Name	Model	SW Version	SW Build	Report Version
FUJIFILM VisualSonics, Inc.	Vevo 2100	2.2.0	12089	8
Measurement File	VSI_CardiacPackage.sxml
Measurement Version	5
Measurement Description	Cardiac Package
Measurement	Mode	Parameter	Units	Instance 1
IVS;d	M-Mode	Depth	mm	0.644705
IVS;s	M-Mode	Depth	mm	1.00425
LV Trace	M-Mode	Heart Rate	BPM	481.856
LV Trace	M-Mode	Diameter;s	mm	2.1885
LV Trace	M-Mode	Diameter;d	mm	3.50211
LV Trace	M-Mode	Volume;s	uL	18.0706
LV Trace	M-Mode	Volume;d	uL	56.9376
LV Trace	M-Mode	Stroke Volume	uL	38.867
LV Trace	M-Mode	Ejection Fraction	%	59.4991
LV Trace	M-Mode	Fractional Shortening	%	31.0575
LV Trace	M-Mode	Cardiac Output	mL/min	17.5696
LVID;d	M-Mode	Depth	mm	2.92148
LVID;s	M-Mode	Depth	mm	1.96556
LVPW;d	M-Mode	Depth	mm	0.590741
LVPW;s	M-Mode	Depth	mm	0.859259

## Sheet: KO4-W1
FUJIFILM VisualSonics Measurement Export
Institution	Northwestern University
Report Date	2023-07-13
Version Information
Company Name	Model	SW Version	SW Build	Report Version
FUJIFILM VisualSonics, Inc.	Vevo 2100	2.2.0	12089	8
Measurement File	VSI_CardiacPackage.sxml
Measurement Version	5
Measurement Description	Cardiac Package
Measurement	Mode	Parameter	Units	Instance 1
IVS;d	M-Mode	Depth	mm	0.798504
IVS;s	M-Mode	Depth	mm	1.18888
LV Trace	M-Mode	Heart Rate	BPM	615.264
LV Trace	M-Mode	Diameter;s	mm	3.50928
LV Trace	M-Mode	Diameter;d	mm	4.72877
LV Trace	M-Mode	Volume;s	uL	43.2212
LV Trace	M-Mode	Volume;d	uL	88.3326
LV Trace	M-Mode	Stroke Volume	uL	45.1114
LV Trace	M-Mode	Ejection Fraction	%	57.3377
LV Trace	M-Mode	Fractional Shortening	%	29.4415
LV Trace	M-Mode	Cardiac Output	mL/min	24.6212
LVID;d	M-Mode	Depth	mm	4.59584
LVID;s	M-Mode	Depth	mm	3.47793
LVPW;d	M-Mode	Depth	mm	0.74527
LVPW;s	M-Mode	Depth	mm	0.869482

## Sheet: WT1-W2
FUJIFILM VisualSonics Measurement Export
Institution	Northwestern University
Report Date	2023-07-13
Version Information
Company Name	Model	SW Version	SW Build	Report Version
FUJIFILM VisualSonics, Inc.	Vevo 2100	2.2.0	12089	8
Measurement File	VSI_CardiacPackage.sxml
Measurement Version	5
Measurement Description	Cardiac Package
Measurement	Mode	Parameter	Units	Instance 1
IVS;d	M-Mode	Depth	mm	0.721509
IVS;s	M-Mode	Depth	mm	1.06104
LV Trace	M-Mode	Heart Rate	BPM	401.533
LV Trace	M-Mode	Diameter;s	mm	2.55836
LV Trace	M-Mode	Diameter;d	mm	3.65257
LV Trace	M-Mode	Volume;s	uL	27.6581
LV Trace	M-Mode	Volume;d	uL	65.4117
LV Trace	M-Mode	Stroke Volume	uL	37.7537
LV Trace	M-Mode	Ejection Fraction	%	44.3876
LV Trace	M-Mode	Fractional Shortening	%	23.8078
LV Trace	M-Mode	Cardiac Output	mL/min	16.8669
LVID;d	M-Mode	Depth	mm	3.5934
LVID;s	M-Mode	Depth	mm	2.63138
LVPW;d	M-Mode	Depth	mm	0.76395
LVPW;s	M-Mode	Depth	mm	1.03275

[truncated: 8 more sheets: WT2-W2, WT3-W2, WT4-W2, WT5-W2, KO1-W2, KO2-W2, KO3-W2, KO4-W2]
