# Supplementary material for: SIRT2 inhibition protects against cardiac hypertrophy and ischemic injury
Source: eLife. 2023 Sep 20;12:e85571. doi: 10.7554/eLife.85571 (PMC10558204; doi:10.7554/eLife.85571)
Supplement: Figure 4—source data 5. [file elife-85571-fig4-data5.xlsx]

## Sheet: wt_1_w1
FUJIFILM VisualSonics Measurement Export
Institution
Report Date	2023-06-01
Version Information
Company Name	Model	SW Version	SW Build	Report Version
FUJIFILM VisualSonics, Inc.	Vevo LAB	5.7.1	2862	8
Study	1
Study Name	Sirt2Amir
Owner User Name	Administrator
Granting Institution
Study Date	2023-05-24
Study Time	14:09:26
Study Notes
Series Name	2220_IR
Acquired By	Sol
Series Date	2023-05-24
Series Time	14:25:49
Animal ID
Sex
Series Notes
Application
Measurement Package
Color
Strain
Source
Weight
Type
Date of Birth
Temperature
Heart Rate
Anesthetic Type
Anesthetic On
Anesthetic Off
Protocol ID
Protocol Name
Injectable
Injection Site
Injection Amount
Measurement File	VSI_GenericPackage.sxml
Measurement Version	0
Measurement Description	Generic Package
MAutoLV 4	M-Mode	Heart Rate	BPM	493.056
MAutoLV 4	M-Mode	Diameter;s	mm	3.26752
MAutoLV 4	M-Mode	Diameter;d	mm	4.12245
MAutoLV 4	M-Mode	Volume;s	uL	43.094
MAutoLV 4	M-Mode	Volume;d	uL	75.1898
MAutoLV 4	M-Mode	Stroke Volume	uL	32.0959
MAutoLV 4	M-Mode	Ejection Fraction	%	48.6865
MAutoLV 4	M-Mode	Fractional Shortening	%	20.7383
MAutoLV 4	M-Mode	Cardiac Output	mL/min	15.8251
MAutoLV 4	M-Mode	LV Mass	mg	87.7229
MAutoLV 4	M-Mode	LV Mass Cor	mg	70.1783
MAutoLV 4	M-Mode	LVAW;s	mm	0.961199
MAutoLV 4	M-Mode	LVAW;d	mm	0.710915
MAutoLV 4	M-Mode	LVPW;s	mm	0.814562
MAutoLV 4	M-Mode	LVPW;d	mm	0.519391

## Sheet: wt-2_w1
FUJIFILM VisualSonics Measurement Export
Institution
Report Date	2023-06-01
Version Information
Company Name	Model	SW Version	SW Build	Report Version
FUJIFILM VisualSonics, Inc.	Vevo LAB	5.7.1	2862	8
Study	1
Study Name	Sirt2Amir
Owner User Name	Administrator
Granting Institution
Study Date	2023-05-24
Study Time	14:09:26
Study Notes
Series Name	2023
Acquired By	Sol
Series Date	2023-05-24
Series Time	14:09:26
Animal ID
Sex
Series Notes
Application
Measurement Package
Color
Strain
Source
Weight
Type
Date of Birth
Temperature
Heart Rate
Anesthetic Type
Anesthetic On
Anesthetic Off
Protocol ID
Protocol Name
Injectable
Injection Site
Injection Amount
Measurement File	VSI_GenericPackage.sxml
Measurement Version	0
Measurement Description	Generic Package
Measurement	Mode	Parameter	Units	Value
MAutoLV 5	M-Mode	Heart Rate	BPM	505.663
MAutoLV 5	M-Mode	Diameter;s	mm	2.94744
MAutoLV 5	M-Mode	Diameter;d	mm	3.99124
MAutoLV 5	M-Mode	Volume;s	uL	33.5248
MAutoLV 5	M-Mode	Volume;d	uL	69.6478
MAutoLV 5	M-Mode	Stroke Volume	uL	36.123
MAutoLV 5	M-Mode	Ejection Fraction	%	50.8652
MAutoLV 5	M-Mode	Fractional Shortening	%	22.1523
MAutoLV 5	M-Mode	Cardiac Output	mL/min	18.2661
MAutoLV 5	M-Mode	LV Mass	mg	90.8158
MAutoLV 5	M-Mode	LV Mass Cor	mg	72.6526
MAutoLV 5	M-Mode	LVAW;s	mm	0.989176
MAutoLV 5	M-Mode	LVAW;d	mm	0.651443
MAutoLV 5	M-Mode	LVPW;s	mm	0.943259
MAutoLV 5	M-Mode	LVPW;d	mm	0.668545

## Sheet: wt-3_W1
FUJIFILM VisualSonics Measurement Export
Institution
Report Date	2023-06-01
Version Information
Company Name	Model	SW Version	SW Build	Report Version
FUJIFILM VisualSonics, Inc.	Vevo LAB	5.7.1	2862	8
Study	1
Study Name	Sirt2Amir
Owner User Name	Administrator
Granting Institution
Study Date	2023-05-24
Study Time	14:09:26
Study Notes
Series Name	2023
Acquired By	Sol
Series Date	2023-05-24
Series Time	14:09:26
Animal ID
Sex
Series Notes
Application
Measurement Package
Color
Strain
Source
Weight
Type
Date of Birth
Temperature
Heart Rate
Anesthetic Type
Anesthetic On
Anesthetic Off
Protocol ID
Protocol Name
Injectable
Injection Site
Injection Amount
Measurement File	VSI_GenericPackage.sxml
Measurement Version	0
Measurement Description	Generic Package
Measurement	Mode	Parameter	Units	Value
MAutoLV 5	M-Mode	Heart Rate	BPM	505.663
MAutoLV 5	M-Mode	Diameter;s	mm	2.94744
MAutoLV 5	M-Mode	Diameter;d	mm	3.99124
MAutoLV 5	M-Mode	Volume;s	uL	33.5248
MAutoLV 5	M-Mode	Volume;d	uL	69.6478
MAutoLV 5	M-Mode	Stroke Volume	uL	36.123
MAutoLV 5	M-Mode	Ejection Fraction	%	49.6144
MAutoLV 5	M-Mode	Fractional Shortening	%	23.0029
MAutoLV 5	M-Mode	Cardiac Output	mL/min	18.2661
MAutoLV 5	M-Mode	LV Mass	mg	90.8158
MAutoLV 5	M-Mode	LV Mass Cor	mg	72.6526
MAutoLV 5	M-Mode	LVAW;s	mm	0.989176
MAutoLV 5	M-Mode	LVAW;d	mm	0.651443
MAutoLV 5	M-Mode	LVPW;s	mm	0.943259
MAutoLV 5	M-Mode	LVPW;d	mm	0.668545

## Sheet: wt-4_W1
FUJIFILM VisualSonics Measurement Export
Institution
Report Date	2023-06-01
Version Information
Company Name	Model	SW Version	SW Build	Report Version
FUJIFILM VisualSonics, Inc.	Vevo LAB	5.7.1	2862	8
Study	1
Study Name	Sirt2Amir
Owner User Name	Administrator
Granting Institution
Study Date	2023-05-24
Study Time	14:09:26
Study Notes
Series Name	2224_IR
Acquired By	Sol
Series Date	2023-05-24
Series Time	14:54:17
Animal ID
Sex
Series Notes
Application
Measurement Package
Color
Strain
Source
Weight
Type
Date of Birth
Temperature
Heart Rate
Anesthetic Type
Anesthetic On
Anesthetic Off
Protocol ID
Protocol Name
Injectable
Injection Site
Injection Amount
Measurement File	VSI_GenericPackage.sxml
Measurement Version	0
Measurement Description	Generic Package
Measurement	Mode	Parameter	Units	Value
MAutoLV 1	M-Mode	Heart Rate	BPM	491.4
MAutoLV 1	M-Mode	Diameter;s	mm	2.95424
MAutoLV 1	M-Mode	Diameter;d	mm	3.92729
MAutoLV 1	M-Mode	Volume;s	uL	33.7255
MAutoLV 1	M-Mode	Volume;d	uL	67.056
MAutoLV 1	M-Mode	Stroke Volume	uL	33.3305
MAutoLV 1	M-Mode	Ejection Fraction	%	43.7697
MAutoLV 1	M-Mode	Fractional Shortening	%	21.3849
MAutoLV 1	M-Mode	Cardiac Output	mL/min	16.3786
MAutoLV 1	M-Mode	LV Mass	mg	127.113
MAutoLV 1	M-Mode	LV Mass Cor	mg	101.691
MAutoLV 1	M-Mode	LVAW;s	mm	1.24221
MAutoLV 1	M-Mode	LVAW;d	mm	0.945201
MAutoLV 1	M-Mode	LVPW;s	mm	1.04283
MAutoLV 1	M-Mode	LVPW;d	mm	0.787162

## Sheet: ko-1_w1
FUJIFILM VisualSonics Measurement Export
Institution
Report Date	2023-06-01
Version Information
Company Name	Model	SW Version	SW Build	Report Version
FUJIFILM VisualSonics, Inc.	Vevo LAB	5.7.1	2862	8
Study	1
Study Name	Sirt2_5_31_2023
Owner User Name	Administrator
Granting Institution
Study Date	2023-05-31
Study Time	13:46:21
Study Notes
Series Name	2233
Acquired By	Sol
Series Date	2023-05-31
Series Time	15:08:47
Animal ID
Sex
Series Notes
Application
Measurement Package
Color
Strain
Source
Weight
Type
Date of Birth
Temperature
Heart Rate
Anesthetic Type
Anesthetic On
Anesthetic Off
Protocol ID
Protocol Name
Injectable
Injection Site
Injection Amount
Measurement File	VSI_GenericPackage.sxml
Measurement Version	0
Measurement Description	Generic Package
Measurement	Mode	Parameter	Units	Value
MAutoLV 2	M-Mode	Heart Rate	BPM	455.737
MAutoLV 2	M-Mode	Diameter;s	mm	2.20226
MAutoLV 2	M-Mode	Diameter;d	mm	3.4424
MAutoLV 2	M-Mode	Volume;s	uL	16.5416
MAutoLV 2	M-Mode	Volume;d	uL	49.0063
MAutoLV 2	M-Mode	Stroke Volume	uL	32.4647
MAutoLV 2	M-Mode	Ejection Fraction	%	62.4662
MAutoLV 2	M-Mode	Fractional Shortening	%	36.9576
MAutoLV 2	M-Mode	Cardiac Output	mL/min	14.7954
MAutoLV 2	M-Mode	LV Mass	mg	139.53
MAutoLV 2	M-Mode	LV Mass Cor	mg	111.624
MAutoLV 2	M-Mode	LVAW;s	mm	1.45545
MAutoLV 2	M-Mode	LVAW;d	mm	1.00034
MAutoLV 2	M-Mode	LVPW;s	mm	1.53823
MAutoLV 2	M-Mode	LVPW;d	mm	1.13253

## Sheet: ko-2_W1
FUJIFILM VisualSonics Measurement Export
Institution
Report Date	2023-06-01
Version Information
Company Name	Model	SW Version	SW Build	Report Version
FUJIFILM VisualSonics, Inc.	Vevo LAB	5.7.1	2862	8
Study	1
Study Name	Sirt2_5_31_2023
Owner User Name	Administrator
Granting Institution
Study Date	2023-05-31
Study Time	13:46:21
Study Notes
Series Name	2232
Acquired By	Sol
Series Date	2023-05-31
Series Time	14:49:33
Animal ID
Sex
Series Notes
Application
Measurement Package
Color
Strain
Source
Weight
Type
Date of Birth
Temperature
Heart Rate
Anesthetic Type
Anesthetic On
Anesthetic Off
Protocol ID
Protocol Name
Injectable
Injection Site
Injection Amount
Measurement File	VSI_GenericPackage.sxml
Measurement Version	0
Measurement Description	Generic Package
Measurement	Mode	Parameter	Units	Value
MAutoLV 5	M-Mode	Heart Rate	BPM	602.087
MAutoLV 5	M-Mode	Diameter;s	mm	2.86463
MAutoLV 5	M-Mode	Diameter;d	mm	3.97881
MAutoLV 5	M-Mode	Volume;s	uL	31.3744
MAutoLV 5	M-Mode	Volume;d	uL	69.1284
MAutoLV 5	M-Mode	Stroke Volume	uL	37.754
MAutoLV 5	M-Mode	Ejection Fraction	%	59.7054
MAutoLV 5	M-Mode	Fractional Shortening	%	28.7766
MAutoLV 5	M-Mode	Cardiac Output	mL/min	22.7312
MAutoLV 5	M-Mode	LV Mass	mg	211.666
MAutoLV 5	M-Mode	LV Mass Cor	mg	169.333
MAutoLV 5	M-Mode	LVAW;s	mm	1.70112
MAutoLV 5	M-Mode	LVAW;d	mm	1.0596
MAutoLV 5	M-Mode	LVPW;s	mm	1.50217
MAutoLV 5	M-Mode	LVPW;d	mm	1.37666

## Sheet: ko3_w1
FUJIFILM VisualSonics Measurement Export
Institution
Report Date	2023-06-01
Version Information
Company Name	Model	SW Version	SW Build	Report Version
FUJIFILM VisualSonics, Inc.	Vevo LAB	5.7.1	2862	8
Study	1
Study Name	Sirt2_5_31_2023
Owner User Name	Administrator
Granting Institution
Study Date	2023-05-31
Study Time	13:46:21
Study Notes
Series Name	2229
Acquired By	Sol
Series Date	2023-05-31
Series Time	14:41:18
Animal ID
Sex
Series Notes
Application
Measurement Package
Color
Strain
Source
Weight
Type
Date of Birth
Temperature
Heart Rate
Anesthetic Type
Anesthetic On
Anesthetic Off
Protocol ID
Protocol Name
Injectable
Injection Site
Injection Amount
Measurement File	VSI_GenericPackage.sxml
Measurement Version	0
Measurement Description	Generic Package
Measurement	Mode	Parameter	Units	Value
MAutoLV 6	M-Mode	Heart Rate	BPM	524.063
MAutoLV 6	M-Mode	Diameter;s	mm	2.92182
MAutoLV 6	M-Mode	Diameter;d	mm	4.12555
MAutoLV 6	M-Mode	Volume;s	uL	33.0306
MAutoLV 6	M-Mode	Volume;d	uL	75.3352
MAutoLV 6	M-Mode	Stroke Volume	uL	42.3045
MAutoLV 6	M-Mode	Ejection Fraction	%	56.1551
MAutoLV 6	M-Mode	Fractional Shortening	%	32.1775
MAutoLV 6	M-Mode	Cardiac Output	mL/min	22.1702
MAutoLV 6	M-Mode	LV Mass	mg	135.845
MAutoLV 6	M-Mode	LV Mass Cor	mg	108.676
MAutoLV 6	M-Mode	LVAW;s	mm	1.40043
MAutoLV 6	M-Mode	LVAW;d	mm	0.957706
MAutoLV 6	M-Mode	LVPW;s	mm	1.13753
MAutoLV 6	M-Mode	LVPW;d	mm	0.757217

## Sheet: ko4_W1
FUJIFILM VisualSonics Measurement Export
Institution
Report Date	2023-06-01
Version Information
Company Name	Model	SW Version	SW Build	Report Version
FUJIFILM VisualSonics, Inc.	Vevo LAB	5.7.1	2862	8
Study	1
Study Name	Sirt2_5_31_2023
Owner User Name	Administrator
Granting Institution
Study Date	2023-05-31
Study Time	13:46:21
Study Notes
Series Name	2231
Acquired By	Sol
Series Date	2023-05-31
Series Time	15:01:50
Animal ID
Sex
Series Notes
Application
Measurement Package
Color
Strain
Source
Weight
Type
Date of Birth
Temperature
Heart Rate
Anesthetic Type
Anesthetic On
Anesthetic Off
Protocol ID
Protocol Name
Injectable
Injection Site
Injection Amount
Measurement File	VSI_GenericPackage.sxml
Measurement Version	0
Measurement Description	Generic Package
Measurement	Mode	Parameter	Units	Value
MAutoLV 4	M-Mode	Heart Rate	BPM	568.478
MAutoLV 4	M-Mode	Diameter;s	mm	2.21091
MAutoLV 4	M-Mode	Diameter;d	mm	3.06509
MAutoLV 4	M-Mode	Volume;s	uL	16.4213
MAutoLV 4	M-Mode	Volume;d	uL	36.9322
MAutoLV 4	M-Mode	Stroke Volume	uL	20.511
MAutoLV 4	M-Mode	Ejection Fraction	%	58.5367
MAutoLV 4	M-Mode	Fractional Shortening	%	27.868
MAutoLV 4	M-Mode	Cardiac Output	mL/min	11.66
MAutoLV 4	M-Mode	LV Mass	mg	169.053
MAutoLV 4	M-Mode	LV Mass Cor	mg	135.242
MAutoLV 4	M-Mode	LVAW;s	mm	0.862218
MAutoLV 4	M-Mode	LVAW;d	mm	0.633175
MAutoLV 4	M-Mode	LVPW;s	mm	2.27308
MAutoLV 4	M-Mode	LVPW;d	mm	2.04396

## Sheet: wt-1_W2
FUJIFILM VisualSonics Measurement Export
Institution
Report Date	2023-06-13
Version Information
Company Name	Model	SW Version	SW Build	Report Version
FUJIFILM VisualSonics, Inc.	Vevo LAB	5.7.1	2862	8
Study	1
Study Name	6_8_2023_Sirt2
Owner User Name	Administrator
Granting Institution
Study Date	2023-06-08
Study Time	14:35:23
Study Notes
Series Name	2233
Acquired By	Sol
Series Date	2023-06-08
Series Time	15:18:49
Animal ID
Sex
Series Notes
Application
Measurement Package
Color
Strain
Source
Weight
Type
Date of Birth
Temperature
Heart Rate
Anesthetic Type
Anesthetic On
Anesthetic Off
Protocol ID
Protocol Name
Injectable
Injection Site
Injection Amount
Measurement File	VSI_GenericPackage.sxml
Measurement Version	0
Measurement Description	Generic Package
Measurement	Mode	Parameter	Units	Value
MAutoLV 4	M-Mode	Heart Rate	BPM	531.594
MAutoLV 4	M-Mode	Diameter;s	mm	3.36404
MAutoLV 4	M-Mode	Diameter;d	mm	4.14743
MAutoLV 4	M-Mode	Volume;s	uL	46.3475
MAutoLV 4	M-Mode	Volume;d	uL	76.281
MAutoLV 4	M-Mode	Stroke Volume	uL	29.9334
MAutoLV 4	M-Mode	Ejection Fraction	%	39.241
MAutoLV 4	M-Mode	Fractional Shortening	%	18.8886
MAutoLV 4	M-Mode	Cardiac Output	mL/min	15.9125
MAutoLV 4	M-Mode	LV Mass	mg	103.654
MAutoLV 4	M-Mode	LV Mass Cor	mg	82.9233
MAutoLV 4	M-Mode	LVAW;s	mm	1.06003
MAutoLV 4	M-Mode	LVAW;d	mm	0.728119
MAutoLV 4	M-Mode	LVPW;s	mm	0.836731
MAutoLV 4	M-Mode	LVPW;d	mm	0.661691

## Sheet: wt-2_w2
FUJIFILM VisualSonics Measurement Export
Institution
Report Date	2023-06-13
Version Information
Company Name	Model	SW Version	SW Build	Report Version
FUJIFILM VisualSonics, Inc.	Vevo LAB	5.7.1	2862	8
Study	1
Study Name	6_8_2023_Sirt2
Owner User Name	Administrator
Granting Institution
Study Date	2023-06-08
Study Time	14:35:23
Study Notes
Series Name	2232
Acquired By	Sol
Series Date	2023-06-08
Series Time	15:02:55
Animal ID
Sex
Series Notes
Application
Measurement Package
Color
Strain
Source
Weight
Type
Date of Birth
Temperature
Heart Rate
Anesthetic Type
Anesthetic On
Anesthetic Off
Protocol ID
Protocol Name
Injectable
Injection Site
Injection Amount
Measurement File	VSI_GenericPackage.sxml
Measurement Version	0
Measurement Description	Generic Package
Measurement	Mode	Parameter	Units	Value
MAutoLV 6	M-Mode	Heart Rate	BPM	624.35
MAutoLV 6	M-Mode	Diameter;s	mm	3.50253
MAutoLV 6	M-Mode	Diameter;d	mm	3.92976
MAutoLV 6	M-Mode	Volume;s	uL	51.3127
MAutoLV 6	M-Mode	Volume;d	uL	67.1134
MAutoLV 6	M-Mode	Stroke Volume	uL	15.8007
MAutoLV 6	M-Mode	Ejection Fraction	%	23.5433
MAutoLV 6	M-Mode	Fractional Shortening	%	10.8716
MAutoLV 6	M-Mode	Cardiac Output	mL/min	9.86518
MAutoLV 6	M-Mode	LV Mass	mg	241.251
MAutoLV 6	M-Mode	LV Mass Cor	mg	193.001
MAutoLV 6	M-Mode	LVAW;s	mm	1.44758
MAutoLV 6	M-Mode	LVAW;d	mm	1.40084
MAutoLV 6	M-Mode	LVPW;s	mm	1.36708
MAutoLV 6	M-Mode	LVPW;d	mm	1.28696
MAutoLV 7	M-Mode	Heart Rate	BPM	431.742
MAutoLV 7	M-Mode	Diameter;s	mm	3.86442
MAutoLV 7	M-Mode	Diameter;d	mm	4.32849
MAutoLV 7	M-Mode	Volume;s	uL	64.7573
MAutoLV 7	M-Mode	Volume;d	uL	84.7561
MAutoLV 7	M-Mode	Stroke Volume	uL	19.9988
MAutoLV 7	M-Mode	Ejection Fraction	%	23.5957
MAutoLV 7	M-Mode	Fractional Shortening	%	10.7213
MAutoLV 7	M-Mode	Cardiac Output	mL/min	8.6343
MAutoLV 7	M-Mode	LV Mass	mg	174.457
MAutoLV 7	M-Mode	LV Mass Cor	mg	139.565
MAutoLV 7	M-Mode	LVAW;s	mm	1.1475
MAutoLV 7	M-Mode	LVAW;d	mm	0.971312
MAutoLV 7	M-Mode	LVPW;s	mm	1.16476
MAutoLV 7	M-Mode	LVPW;d	mm	0.972587

[truncated: 6 more sheets: WT-3-W2, WT-4-w2, ko_1_w2, ko_2_W2, ko_3_W2, ko_4_W4]
