# Supplementary material for: SIRT2 inhibition protects against cardiac hypertrophy and ischemic injury
Source: eLife. 2023 Sep 20;12:e85571. doi: 10.7554/eLife.85571 (PMC10558204; doi:10.7554/eLife.85571)
Supplement: Figure 5—figure supplement 2—source data 3. [file elife-85571-fig5-figsupp2-data3.xlsx]

## Sheet: Fig 5-Suppl 2B
	G6PD	PGD
EV1	1.17086	1.01802
EV2	0.826432	0.863435
EV3	0.991213	0.957311
EV4	0.955063	1.00435
EV5	1.02677	1.04103
EV6	1.02966	1.11586
Sirt2 1	0.612728	0.462142
Sirt2 2	0.639434	0.632071
Sirt2 3	0.671132	0.657271
Sirt2 4	0.719102
Sirt2 5	0.754539	0.643343
Sirt2 6	0.754774	0.65857

## Sheet: Fig 5-Suppl 2C
	Nqo1	Gclc	Gclm	Gss	Gsr	Gpx4 mt	GstA1	GstA2	GstM1	GstP1
EV1	1.08831	1.00563	1.25073	1.03872	1.00672	0.924318	0.927597	1.23561	0.917975	1.05133
EV2	0.771851	0.941739	0.842802	0.801907	0.942826	0.778442	0.838784	0.819848	0.895104	0.918989
EV3	0.940561	1.01917	0.940934	0.970572	0.912099	0.984225	0.934891	0.746094	0.985021	0.920328
EV4	1.01339	0.986369	0.95156	0.942136	1.14066		1.15658	1.05047	1.09903	1.02649
EV5	1.03997	0.903158	0.892371	0.986067	0.852052	1.13777	1.04125	1.10434	0.88055	0.896435
EV6	1.14591	1.14393	1.12161	1.2606	1.14565	1.17524	1.10089	1.04364	1.22232	1.18642
Sirt2 1	0.483284	0.478785	0.316421	0.546827	0.420132	0.455528	0.460388	0.494135	0.613688	0.468516
Sirt2 2	0.566126	0.487306	0.571239	0.571255	0.522268	0.456872	0.500857	0.570947	0.517104	0.533079
Sirt2 3	0.696355	0.550075	0.651829	0.621535	0.621473	0.624668	0.699779	0.612223	0.633153	0.655887
Sirt2 4	0.714147	0.576383	0.628492	0.630211	0.644281	0.560995	0.639701	0.543755	0.656573	0.579596
Sirt2 5	0.696789	0.646848	0.648899	0.607353	0.599721	0.671175	0.775109	0.639417	0.738887	0.651267
Sirt2 6	0.642088	0.634921	0.684687	0.620007	0.595805	0.626815	0.689308	0.912678	0.76111	0.632427

## Sheet: Sheet3
	Txn1	Prdx1	Txnrd1
EV1	0.946058	0.958993
EV2	1.06183	0.948153	0.817674
EV3	0.93137	0.894834	0.93887
EV4	1.04592	1.05929	1.09361
EV5	1.01482	1.02879	0.991956
EV6		1.10995	1.15789
Sirt2 1	0.622826	0.426596	0.468671
Sirt2 2	0.701542	0.485483	0.610388
Sirt2 3	0.783199	0.595054	0.670867
Sirt2 4	0.672451	0.613014	0.525003
Sirt2 5	0.862876	0.625114	0.590782
Sirt2 6		0.740742	0.637611
