# Supplementary figures and images for: SIRT2 inhibition protects against cardiac hypertrophy and ischemic injury
Source: eLife journal article supplement (doi:10.7554/elife.85571), 2023-09-20

Figure 5-figure supplemental 3

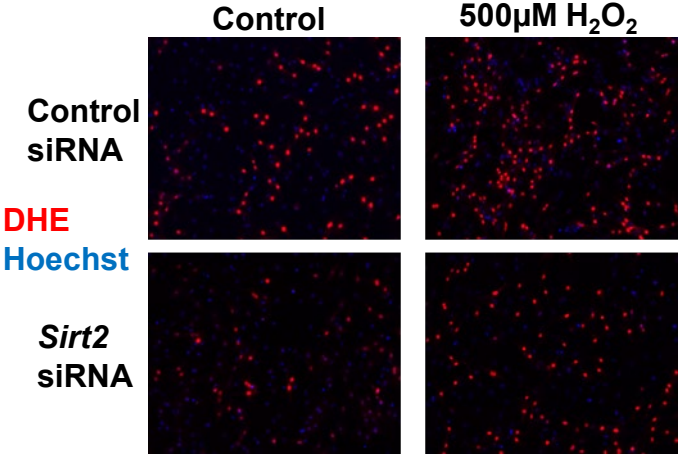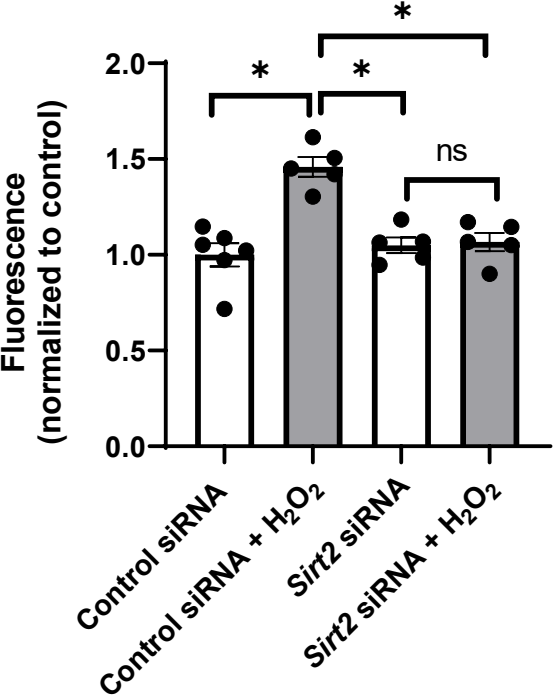

Supplement: supp [file elife-85571-supp-v1.zip]

Figure 4- figure supplemental 2

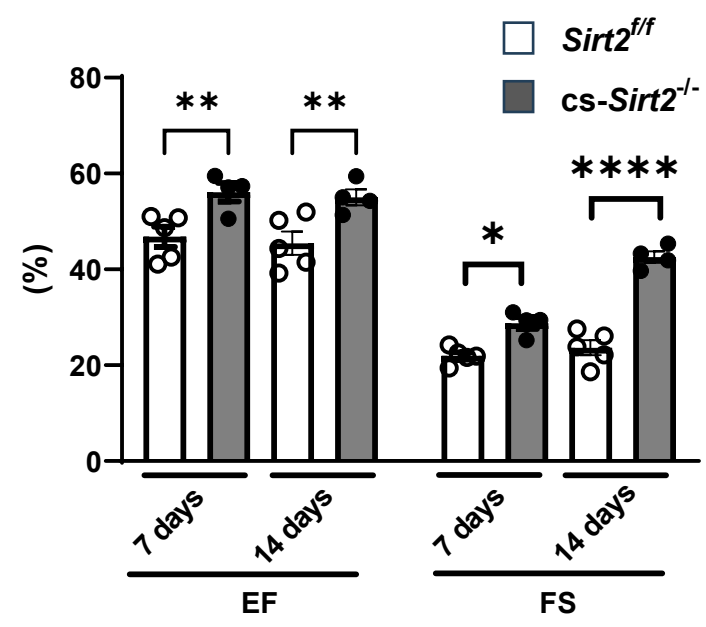

Supplement: supp [file elife-85571-supp-v1.zip]

Figure 5-figure supplement 1

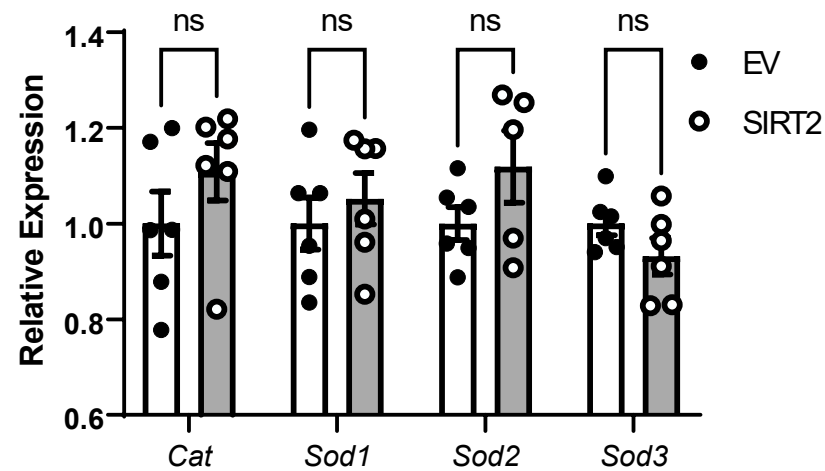

Supplement: supp [file elife-85571-supp-v1.zip]

Figure 1-figure supplemental 1

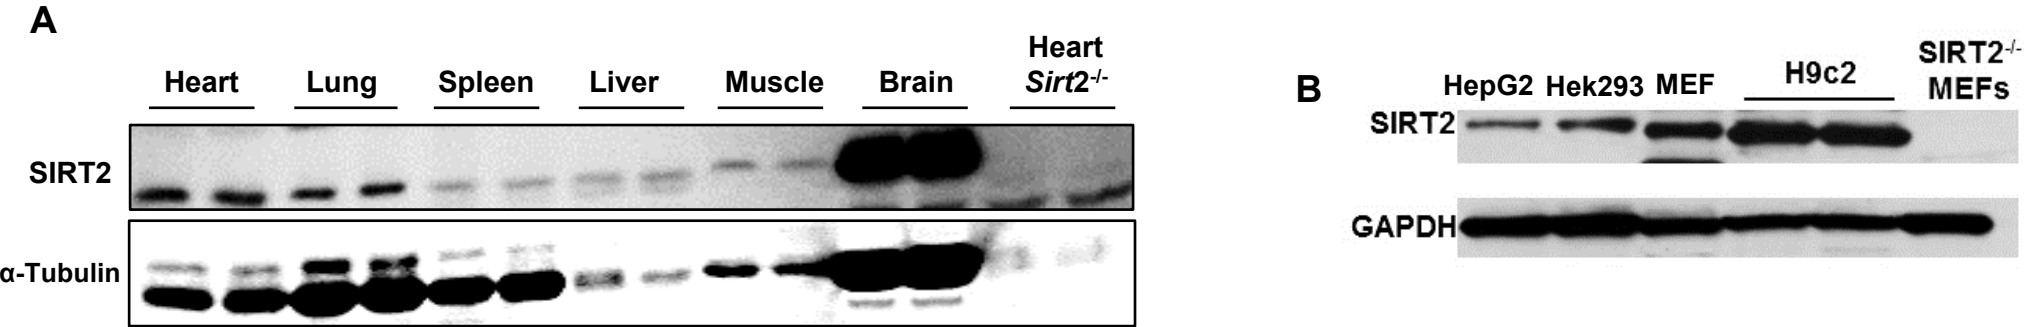

Supplement: supp [file elife-85571-supp-v1.zip]

Figure 5-figure supplemental 2

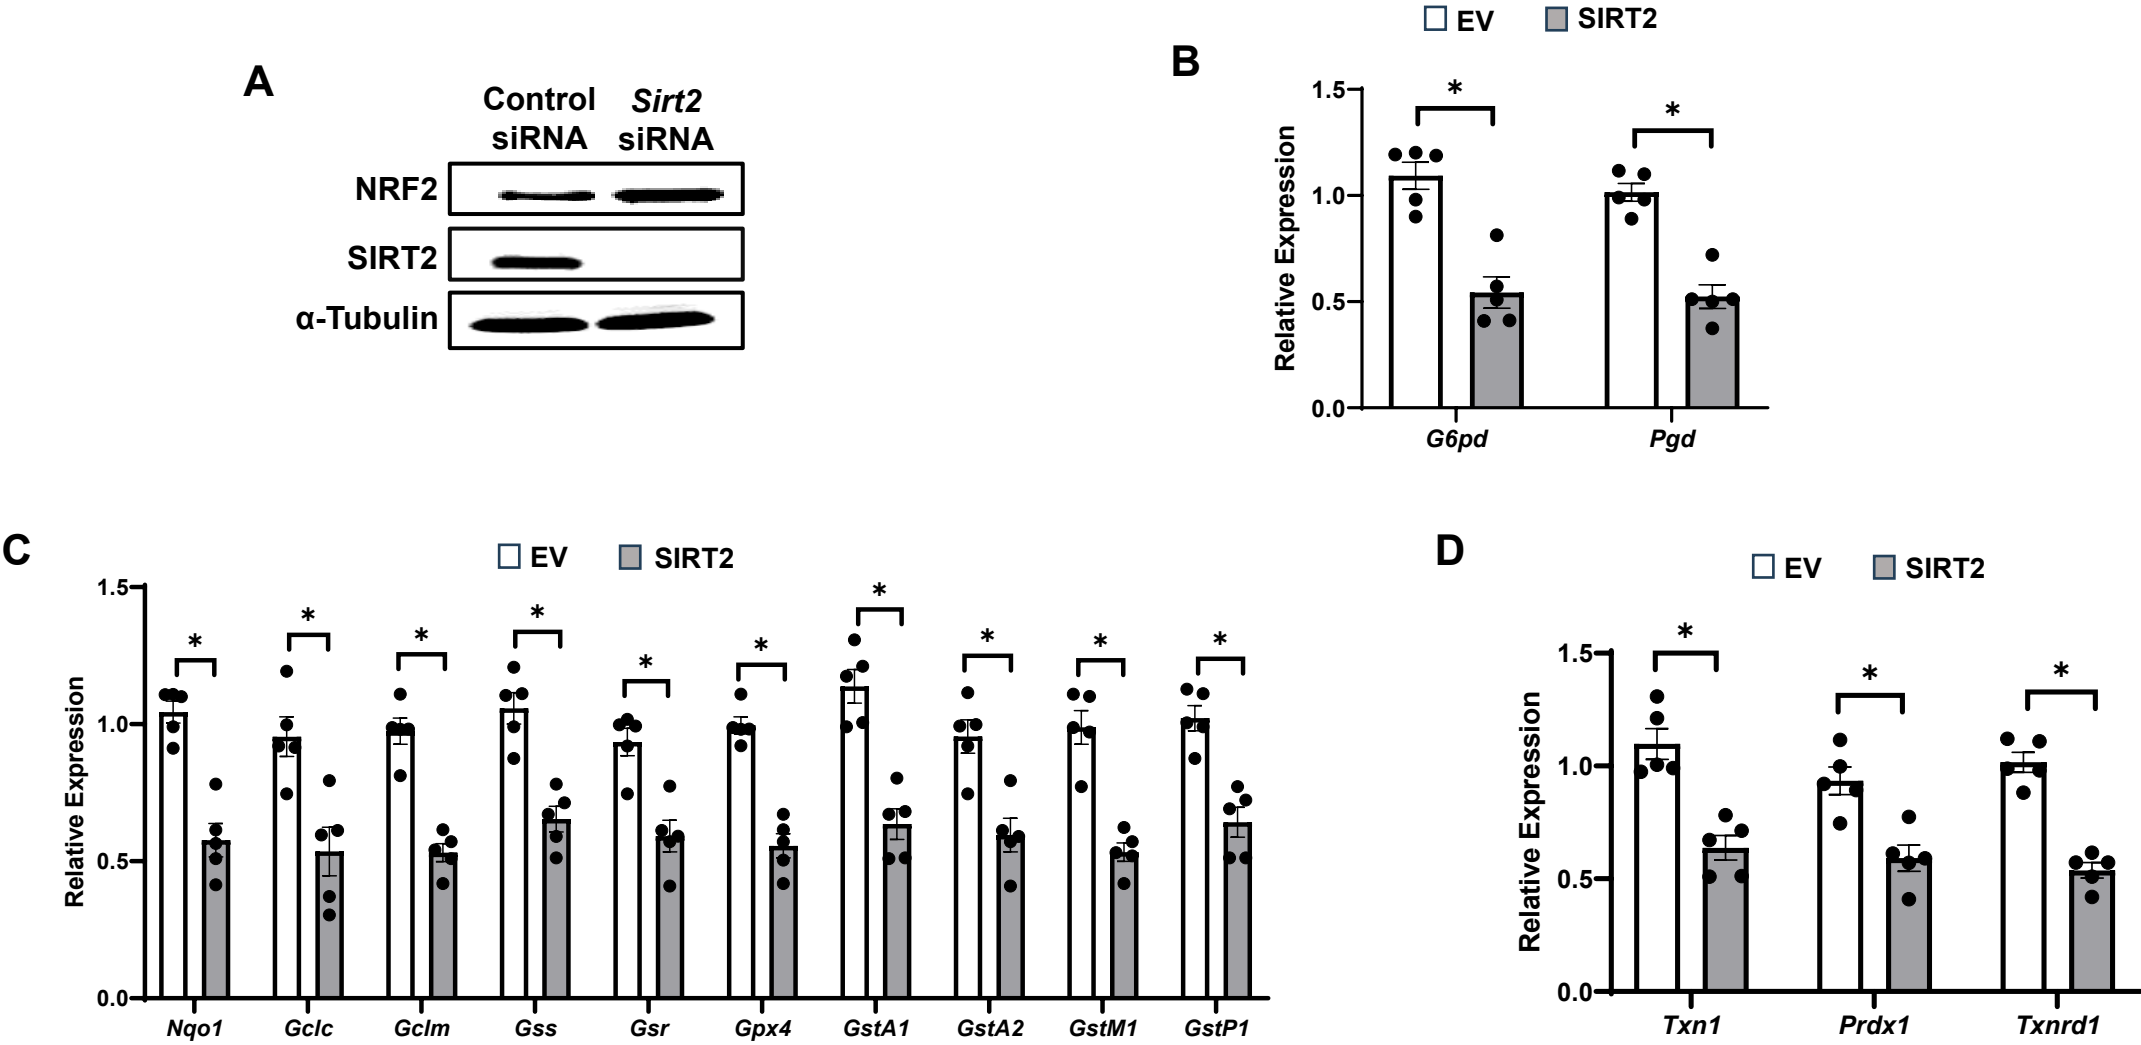

Supplement: supp [file elife-85571-supp-v1.zip]

Figure 2-figure supplement 1

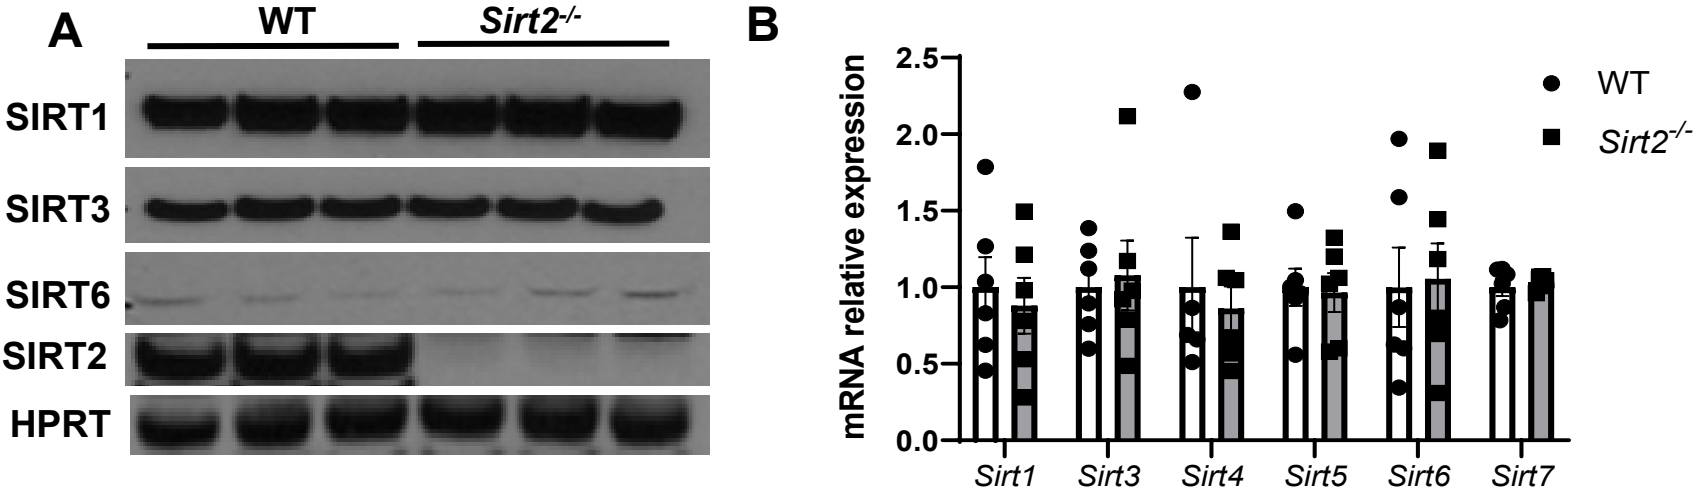

Supplement: supp [file elife-85571-supp-v1.zip]

### Figure 4- figure supplemental 1

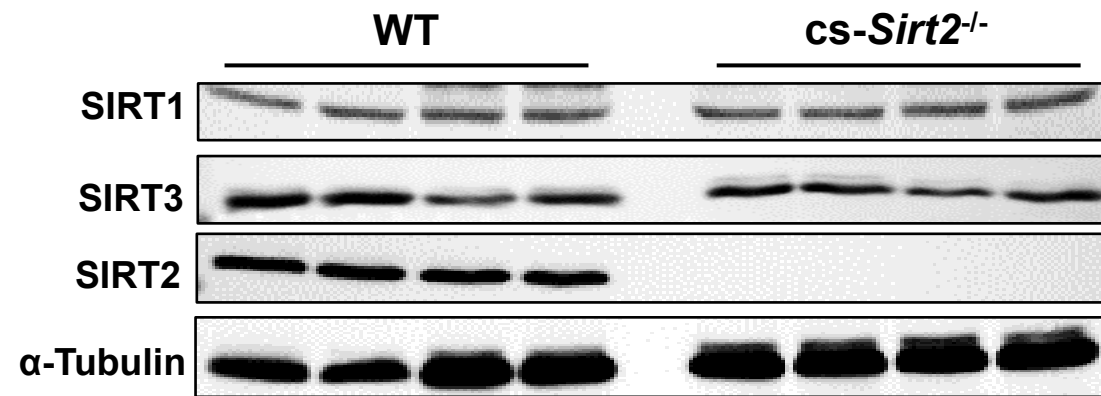

Supplement: supp [file elife-85571-supp-v1.zip]
